# Supplementary material
Source: PubMed Central journal article supplement (PMC4117735)

## Technical Appendix

**Table S1: Diagnosis and Procedure Codes Used to Ascertain Incident Hip Fracture and Associated Surgical Treatment**

| <b>ICD 9 Code</b>                      | <b>Descriptions</b>                                                                        |
|----------------------------------------|--------------------------------------------------------------------------------------------|
| <u>Hip Fracture</u>                    |                                                                                            |
| 820.XX                                 | Fracture neck of femur                                                                     |
| 821.XX                                 | Fracture of other and unspecified parts of femur                                           |
| <u>Surgical Repair of Hip Fracture</u> |                                                                                            |
| 78.55, 79.15, 79.35                    | Internal fixation (without reduction, closed reduction, open reduction)                    |
| 81.52                                  | Partial hip replacement                                                                    |
| 81.51                                  | Total hip replacement                                                                      |
| 79.05, 79.25, 81.40                    | Reduction without internal fixation (closed, open); Repair of hip not otherwise specified. |

**Table S2: Diagnosis and Procedure Codes Used to Ascertain Baseline Characteristics**

| <b>Comorbidity</b>                   | <b>ICD-9 Codes</b>                                                                                                                             |
|--------------------------------------|------------------------------------------------------------------------------------------------------------------------------------------------|
| Prior myocardial infarction          | 410.x                                                                                                                                          |
| Unstable angina                      | 411.x, 413.x                                                                                                                                   |
| Percutaneous coronary intervention   | 36.0x, 00.66                                                                                                                                   |
| Valvular disease                     | 394.x-397.1, 424.x, 746.3-746.6, v42.2, v43.3                                                                                                  |
| Atrial fibrillation                  | 427.3x                                                                                                                                         |
| Ventricular fibrillation             | 427.1, 427.4x                                                                                                                                  |
| Other arrhythmia                     | 426.x, 427.0, 427.20, 427.81, 427.9                                                                                                            |
| Implantable cardiac defibrillator    | 37.9x, 996.04, v53.32                                                                                                                          |
| Pacemaker                            | 37.7x, 37.8x, 996.01, v45.00, v45.01, v45.02, v45.09, v53.31                                                                                   |
| Heart failure                        | 398.91, 402.01, 402.11, 402.91, 404.01, 404.03, 404.13, 404.91, 428.x,                                                                         |
| Hypertension                         | 401.0, 401.1, 401.9, 402.x, 403.x, 404.x, 405.x                                                                                                |
| Peripheral vascular disease          | 38.03, 38.04, 38.05, 38.08, 38.33-38.48, 39.22-39.29, 440.2x, 440.3x, 440.4x, 441.x, 443.x, 445.x, 447.10, 557.10, 557.90, v43.4,              |
| Pulmonary hypertension               | 416.x, 417.9                                                                                                                                   |
| Stroke                               | 433.x, 434.x, 436.00                                                                                                                           |
| Transient ischemic attack            | 435.x                                                                                                                                          |
| Intracranial atherosclerotic disease | 433.x, 434.x, 437.x, 438x.                                                                                                                     |
| Intracranial hemorrhage              | 430, 431.00, 432.x                                                                                                                             |
| Diabetes mellitus                    | 249.x, 250.x, 357.2, 362.0x                                                                                                                    |
| Obesity                              | 278.0x, 649.1x, v85.3x, v85.4                                                                                                                  |
| Hyperlipidemia                       | 272.x                                                                                                                                          |
| Peptic ulcer disease                 | 531.7, 531.0, 531.71, 531.9, 531.90, 531.91, 532.7, 532.70, 532.71, 532.9x, 533.7x, 534.7x, 534.9x                                             |
| Gastrointestinal bleed               | 456.00, 456.0, 456.20, 530.21, 530.70, 530.82, 531.0x, 531.2x, 531.4x, 531.6x, 532.2x, 532.4x, 532.6x, 533.0x, 533.2x, 534.0x, 534.2x, 534.4x, |

|                              |                                                                                         |
|------------------------------|-----------------------------------------------------------------------------------------|
|                              | 534.6x, 535.x1, 537.83, 537.84, 562.02, 562.03,<br>562.12, 562.13, 569.3, 569.85, 578.x |
| Chronic liver disease        | 070.x, 456.1, 456.21, 570-573.x, v42.7                                                  |
| Systemic cancer              | 140.x-165.x, 170.x-172.x, 174.x, 175.x, 180.x-209.x,<br>238.6, 273.3                    |
| Chronic lung disease         | 490, 491.x-496, 500-505, 506.4, 516.x                                                   |
| Rheumatologic disease        | 701.x, 714.x, 720.x, 725.00                                                             |
| Dementia                     | 290.x, 294.1x, 331.x                                                                    |
| Depression                   | 296.2x, 296.3x, 296.5x, 296.82, 300.40, 301.12,<br>309.0, 309.10, 311                   |
| Psychosis                    | 295.x, 296.x, 297.x, 298.x, 299.1, 299.10, 299.11                                       |
| Paralysis                    | 342.x, 343.x, 344.x                                                                     |
| Drug abuse                   | 292.x, 304.x, 305.x,                                                                    |
| Tobacco use                  | 305.1x                                                                                  |
| Alcohol abuse                | 291.x, 303.x, 305.x                                                                     |
| Human immunodeficiency virus | 042, 043, 044                                                                           |
| Hypothyroidism               | 243, 244.x                                                                              |
| Hyper-/hyponatremia          | 276.0, 276.10                                                                           |
| Phosphate disorders          | 275.30                                                                                  |
| Hyper-/hypocalcemia          | 275.4, 275.41                                                                           |
| Hyperparathyroidism          | 252.0x                                                                                  |
| Magnesium disorder           | 275.20                                                                                  |
| Hyper-/hypokalemia           | 276.70, 276.80                                                                          |
| Acid/base disorders          | 276.20, 276.30, 276.40                                                                  |

**Table S3: Detailed Characteristics of Study Patients, by Era**

| <i>N (%) or Median (IQR)</i>                | <i>All Patients</i> |         | <i>1996-1999</i> |        | <i>2000-2004</i> |        | <i>2005-2009</i> |        |
|---------------------------------------------|---------------------|---------|------------------|--------|------------------|--------|------------------|--------|
| <i>Total</i>                                | 409040              | (100.0) | 105565           | (25.8) | 152790           | (37.4) | 150685           | (36.8) |
| <i>Myocardial Infarction</i>                | 65379               | (16.0)  | 16845            | (16.0) | 25296            | (16.6) | 23238            | (15.4) |
| <i>Unstable Angina</i>                      | 98539               | (24.1)  | 30586            | (29.0) | 38335            | (25.1) | 29618            | (19.7) |
| <i>Coronary artery bypass surgery</i>       | 30574               | (7.5)   | 7286             | (6.9)  | 11924            | (7.8)  | 11364            | (7.5)  |
| <i>Percutaneous Coronary Intervention</i>   | 19446               | (4.8)   | 3873             | (3.7)  | 7481             | (4.9)  | 8092             | (5.4)  |
| <i>Valvular Disease</i>                     | 146943              | (35.9)  | 34915            | (33.1) | 54468            | (35.6) | 57560            | (38.2) |
| <i>Atrial fibrillation</i>                  | 118556              | (29.0)  | 26696            | (25.3) | 44422            | (29.1) | 47438            | (31.5) |
| <i>Ventricular Fibrillation</i>             | 29569               | (7.2)   | 6100             | (5.8)  | 10786            | (7.1)  | 12683            | (8.4)  |
| <i>Other arrhythmia</i>                     | 84282               | (20.6)  | 20734            | (19.6) | 31569            | (20.7) | 31979            | (21.2) |
| <i>Implantable cardiac defibrillator</i>    | 6411                | (1.6)   | 511              | (0.5)  | 2256             | (1.5)  | 3644             | (2.4)  |
| <i>Pacemaker</i>                            | 18513               | (4.5)   | 4306             | (4.1)  | 7476             | (4.9)  | 6731             | (4.5)  |
| <i>Heart failure</i>                        | 272601              | (66.6)  | 70941            | (67.2) | 102247           | (66.9) | 99413            | (66.0) |
| <i>Hypertension</i>                         | 381270              | (93.2)  | 95667            | (90.6) | 141516           | (92.6) | 144087           | (95.6) |
| <i>Peripheral vascular Disease</i>          | 148836              | (36.4)  | 36686            | (34.8) | 55695            | (36.5) | 56455            | (37.5) |
| <i>Pulmonary hypertension</i>               | 35232               | (8.6)   | 7028             | (6.7)  | 12384            | (8.1)  | 15820            | (10.5) |
| <i>Stroke</i>                               | 65720               | (16.1)  | 16534            | (15.7) | 24536            | (16.1) | 24650            | (16.4) |
| <i>Transient Ischemic attack</i>            | 32913               | (8.0)   | 9036             | (8.6)  | 12588            | (8.2)  | 11289            | (7.5)  |
| <i>Intracranial atherosclerotic disease</i> | 98294               | (24.0)  | 23446            | (22.2) | 35568            | (23.3) | 39280            | (26.1) |
| <i>Intracranial hemorrhage</i>              | 5914                | (1.4)   | 1722             | (1.6)  | 2038             | (1.3)  | 2154             | (1.4)  |
| <i>Diabetes</i>                             | 237735              | (58.1)  | 56420            | (53.4) | 88516            | (57.9) | 92799            | (61.6) |
| <i>Obesity</i>                              | 30005               | (7.3)   | 4987             | (4.7)  | 10423            | (6.8)  | 14595            | (9.7)  |
| <i>Hyperlipidemia</i>                       | 209973              | (51.3)  | 31126            | (29.5) | 75405            | (49.4) | 103442           | (68.6) |
| <i>Peptic Ulcer Disease</i>                 | 20996               | (5.1)   | 7129             | (6.8)  | 8053             | (5.3)  | 5814             | (3.9)  |
| <i>Gastrointestinal bleed</i>               | 87279               | (21.3)  | 22534            | (21.3) | 33406            | (21.9) | 31339            | (20.8) |
| <i>Chronic Liver Disease</i>                | 24998               | (6.1)   | 4904             | (4.6)  | 8819             | (5.8)  | 11275            | (7.5)  |
| <i>Cancer</i>                               | 83017               | (20.3)  | 20132            | (19.1) | 30416            | (19.9) | 32469            | (21.5) |
| <i>Chronic Lung Disease</i>                 | 159547              | (39.0)  | 37713            | (35.7) | 59076            | (38.7) | 62758            | (41.6) |
| <i>Rheumatologic disease</i>                | 22142               | (5.4)   | 5646             | (5.3)  | 8064             | (5.3)  | 8432             | (5.6)  |
| <i>Depression</i>                           | 45961               | (11.2)  | 9784             | (9.3)  | 17295            | (11.3) | 18882            | (12.5) |
| <i>Dementia</i>                             | 36611               | (9.0)   | 7616             | (7.2)  | 13735            | (9.0)  | 15260            | (10.1) |

| <i>N (%) or Median (IQR)</i>        | <i>All Patients</i> |        | <i>1996-1999</i> |        | <i>2000-2004</i> |        | <i>2005-2009</i> |        |
|-------------------------------------|---------------------|--------|------------------|--------|------------------|--------|------------------|--------|
| <i>Psychosis</i>                    | 17283               | (4.2)  | 3850             | (3.6)  | 6290             | (4.1)  | 7143             | (4.7)  |
| <i>Paralysis</i>                    | 15627               | (3.8)  | 5511             | (5.2)  | 5585             | (3.7)  | 4531             | (3.0)  |
| <i>Drug Abuse</i>                   | 4173                | (1.0)  | 913              | (0.9)  | 1539             | (1.0)  | 1721             | (1.1)  |
| <i>Tobacco Use</i>                  | 20013               | (4.9)  | 3689             | (3.5)  | 7645             | (5.0)  | 8679             | (5.8)  |
| <i>Alcohol Use</i>                  | 6307                | (1.5)  | 1537             | (1.5)  | 2373             | (1.6)  | 2397             | (1.6)  |
| <i>Human Immunodeficiency Virus</i> | 382                 | (0.1)  | 46               | (0.0)  | 135              | (0.1)  | 201              | (0.1)  |
| <i>Hypothyroidism</i>               | 75749               | (18.5) | 14856            | (14.1) | 28075            | (18.4) | 32818            | (21.8) |
| <i>Hyponatremia</i>                 | 50165               | (12.3) | 12502            | (11.8) | 16639            | (10.9) | 21024            | (14.0) |
| <i>Hypernatremia</i>                | 10710               | (2.6)  | 1851             | (1.8)  | 3272             | (2.1)  | 5587             | (3.7)  |
| <i>Phosphate Disorder</i>           | 11817               | (2.9)  | 1815             | (1.7)  | 3760             | (2.5)  | 6242             | (4.1)  |
| <i>Hypocalcemia</i>                 | 11280               | (2.8)  | 1361             | (1.3)  | 5182             | (3.4)  | 4737             | (3.1)  |
| <i>Hypercalcemia</i>                | 8188                | (2.0)  | 601              | (0.6)  | 3208             | (2.1)  | 4379             | (2.9)  |
| <i>Hyperparathyroidism</i>          | 13253               | (3.2)  | 913              | (0.9)  | 3338             | (2.2)  | 9002             | (6.0)  |
| <i>Magnesium Disorders</i>          | 9441                | (2.3)  | 1359             | (1.3)  | 3232             | (2.1)  | 4850             | (3.2)  |
| <i>Hypokalemia</i>                  | 52767               | (12.9) | 13147            | (12.5) | 18875            | (12.4) | 20745            | (13.8) |
| <i>Hyperkalemia</i>                 | 114084              | (27.9) | 24239            | (23.0) | 42744            | (28.0) | 47101            | (31.3) |
| <i>Acidosis</i>                     | 71976               | (17.6) | 13035            | (12.3) | 24059            | (15.7) | 34882            | (23.1) |
| <i>Alkalosis</i>                    | 5495                | (1.3)  | 931              | (0.9)  | 1744             | (1.1)  | 2820             | (1.9)  |
| <i>Mixed Acid Base Disorder</i>     | 4660                | (1.1)  | 1032             | (1.0)  | 1541             | (1.0)  | 2087             | (1.4)  |



**Table S4: Comparison of Results from Main and Sensitivity Analyses**

**Outcome: Time to first hip fracture**

| Year of ESRD | Complete Case Analysis (N=283,907) |                  |                  | Using multiple imputation (N=409,040) |                  |                  |
|--------------|------------------------------------|------------------|------------------|---------------------------------------|------------------|------------------|
|              | Cause specific HR (95% CI)         |                  |                  |                                       |                  |                  |
|              | Model 1                            | Model 2          | Model 3          | Model 1                               | Model 2          | Model 3          |
| 1996         | 1.00 [Referent]                    | 1.00 [Referent]  | 1.00 [Referent]  | 1.00 [Referent]                       | 1.00 [Referent]  | 1.00 [Referent]  |
| 1997         | 1.01 [0.90,1.13]                   | 1.00 [0.89,1.11] | 0.99 [0.89,1.10] | 1.01 [0.92,1.10]                      | 0.99 [0.91,1.08] | 0.99 [0.90,1.08] |
| 1998         | 1.11 [1.00,1.24]                   | 1.08 [0.97,1.20] | 1.09 [0.97,1.21] | 1.13 [1.03,1.23]                      | 1.09 [1.00,1.19] | 1.10 [1.00,1.19] |
| 1999         | 1.13 [1.02,1.26]                   | 1.08 [0.97,1.20] | 1.11 [1.00,1.27] | 1.11 [1.02,1.21]                      | 1.06 [0.98,1.16] | 1.09 [1.00,1.19] |
| 2000         | 1.27 [1.14,1.40]                   | 1.19 [1.07,1.32] | 1.25 [1.13,1.38] | 1.24 [1.14,1.35]                      | 1.18 [1.08,1.28] | 1.23 [1.13,1.34] |
| 2001         | 1.35 [1.22,1.49]                   | 1.26 [1.14,1.39] | 1.31 [1.19,1.45] | 1.33 [1.22,1.44]                      | 1.25 [1.15,1.35] | 1.29 [1.19,1.40] |
| 2002         | 1.48 [1.35,1.63]                   | 1.37 [1.24,1.51] | 1.42 [1.29,1.57] | 1.43 [1.32,1.55]                      | 1.32 [1.22,1.43] | 1.36 [1.25,1.48] |
| 2003         | 1.44 [1.30,1.58]                   | 1.32 [1.20,1.46] | 1.39 [1.25,1.53] | 1.45 [1.34,1.57]                      | 1.34 [1.24,1.45] | 1.39 [1.29,1.51] |
| 2004         | 1.51 [1.37,1.66]                   | 1.37 [1.24,1.51] | 1.43 [1.30,1.58] | 1.45 [1.34,1.57]                      | 1.32 [1.22,1.43] | 1.37 [1.26,1.49] |
| 2005         | 1.34 [1.21,1.47]                   | 1.21 [1.10,1.34] | 1.29 [1.16,1.42] | 1.35 [1.25,1.46]                      | 1.23 [1.14,1.33] | 1.30 [1.19,1.41] |
| 2006         | 1.27 [1.15,1.40]                   | 1.14 [1.04,1.26] | 1.23 [1.11,1.36] | 1.28 [1.18,1.39]                      | 1.16 [1.07,1.25] | 1.23 [1.13,1.34] |
| 2007         | 1.37 [1.24,1.52]                   | 1.23 [1.11,1.36] | 1.31 [1.18,1.46] | 1.38 [1.27,1.50]                      | 1.24 [1.14,1.34] | 1.32 [1.21,1.44] |
| 2008         | 1.33 [1.19,1.49]                   | 1.17 [1.05,1.31] | 1.25 [1.12,1.41] | 1.33 [1.22,1.46]                      | 1.18 [1.08,1.29] | 1.25 [1.14,1.38] |
| 2009         | 1.32 [1.13,1.53]                   | 1.16 [1.00,1.35] | 1.25 [1.07,1.46] | 1.27 [1.12,1.45]                      | 1.13 [1.00,1.29] | 1.20 [1.05,1.37] |
|              | <b>Subdistribution HR (95% CI)</b> |                  |                  |                                       |                  |                  |
| 1996         | 1.00 [Referent]                    | 1.00 [Referent]  | 1.00 [Referent]  | 1.00 [Referent]                       | 1.00 [Referent]  | 1.00 [Referent]  |
| 1997         | 0.99 [0.89,1.11]                   | 0.98 [0.88,1.10] | 0.98 [0.88,1.10] | 0.99 [0.90,1.08]                      | 0.98 [0.90,1.10] | 0.98 [0.89,1.07] |
| 1998         | 1.08 [0.97,1.20]                   | 1.05 [0.95,1.17] | 1.07 [0.96,1.19] | 1.10 [1.01,1.20]                      | 1.08 [0.99,1.18] | 1.09 [1.00,1.19] |
| 1999         | 1.10 [0.99,1.23]                   | 1.07 [0.96,1.19] | 1.10 [0.98,1.22] | 1.09 [1.00,1.19]                      | 1.06 [0.97,1.16] | 1.08 [0.99,1.18] |
| 2000         | 1.23 [1.12,1.37]                   | 1.18 [1.07,1.31] | 1.25 [1.12,1.38] | 1.21 [1.12,1.32]                      | 1.18 [1.08,1.28] | 1.23 [1.13,1.33] |
| 2001         | 1.32 [1.20,1.46]                   | 1.27 [1.15,1.40] | 1.32 [1.20,1.46] | 1.31 [1.20,1.42]                      | 1.26 [1.16,1.36] | 1.30 [1.20,1.41] |
| 2002         | 1.44 [1.31,1.59]                   | 1.37 [1.25,1.52] | 1.43 [1.30,1.58] | 1.40 [1.30,1.52]                      | 1.35 [1.24,1.46] | 1.38 [1.27,1.50] |
| 2003         | 1.40 [1.27,1.54]                   | 1.33 [1.21,1.47] | 1.40 [1.27,1.55] | 1.42 [1.31,1.54]                      | 1.36 [1.26,1.47] | 1.41 [1.30,1.53] |

|      |                  |                  |                  |                  |                  |                  |
|------|------------------|------------------|------------------|------------------|------------------|------------------|
| 2004 | 1.47 [1.34,1.62] | 1.39 [1.26,1.53] | 1.46 [1.32,1.61] | 1.43 [1.32,1.55] | 1.36 [1.26,1.47] | 1.41 [1.30,1.53] |
| 2005 | 1.31 [1.18,1.44] | 1.23 [1.12,1.36] | 1.31 [1.18,1.44] | 1.33 [1.22,1.44] | 1.26 [1.17,1.37] | 1.32 [1.21,1.43] |
| 2006 | 1.24 [1.12,1.37] | 1.16 [1.05,1.28] | 1.24 [1.12,1.37] | 1.25 [1.16,1.36] | 1.19 [1.09,1.29] | 1.24 [1.14,1.35] |
| 2007 | 1.34 [1.22,1.49] | 1.26 [1.14,1.39] | 1.34 [1.21,1.49] | 1.36 [1.25,1.48] | 1.29 [1.18,1.40] | 1.35 [1.24,1.47] |
| 2008 | 1.32 [1.18,1.47] | 1.22 [1.10,1.37] | 1.31 [1.17,1.47] | 1.33 [1.21,1.46] | 1.24 [1.13,1.36] | 1.30 [1.18,1.43] |
| 2009 | 1.30 [1.12,1.51] | 1.21 [1.04,1.40] | 1.30 [1.11,1.51] | 1.27 [1.12,1.44] | 1.19 [1.05,1.35] | 1.25 [1.10,1.43] |

**Outcome: 30-Day Case fatality**

**Complete Cases N=12,623**

**Using multiple imputation (N=17,887)**

**Risk Ratio (95% CI)**

|      |                   |                   |                   |                   |                   |                   |
|------|-------------------|-------------------|-------------------|-------------------|-------------------|-------------------|
| 1996 | 1.00 [Referent]   |
| 1997 | 0.96 [0.77, 1.21] | 0.98 [0.79, 1.24] | 0.98 [0.79, 1.24] | 0.94 [0.78, 1.13] | 0.96 [0.80, 1.15] | 0.94 [0.79, 1.13] |
| 1998 | 1.07 [0.87, 1.34] | 1.06 [0.86, 1.32] | 1.04 [0.84, 1.30] | 1.01 [0.84, 1.20] | 1.00 [0.84, 1.18] | 0.97 [0.82, 1.16] |
| 1999 | 0.96 [0.77, 1.21] | 0.94 [0.76, 1.19] | 0.94 [0.76, 1.18] | 0.93 [0.78, 1.11] | 0.91 [0.76, 1.09] | 0.89 [0.74, 1.06] |
| 2000 | 0.86 [0.70, 1.08] | 0.84 [0.68, 1.05] | 0.84 [0.68, 1.05] | 0.89 [0.75, 1.06] | 0.87 [0.73, 1.03] | 0.85 [0.71, 1.01] |
| 2001 | 0.98 [0.81, 1.23] | 0.95 [0.80, 1.19] | 0.95 [0.78, 1.18] | 1.00 [0.85, 1.18] | 1.00 [0.82, 1.14] | 0.94 [0.79, 1.11] |
| 2002 | 0.98 [0.81, 1.21] | 0.93 [0.77, 1.15] | 0.94 [0.77, 1.17] | 0.94 [0.80, 1.11] | 0.90 [0.76, 1.06] | 0.87 [0.74, 1.03] |
| 2003 | 0.88 [0.73, 1.10] | 0.84 [0.69, 1.04] | 0.84 [0.69, 1.04] | 0.86 [0.72, 1.01] | 0.82 [0.69, 0.97] | 0.80 [0.67, 0.95] |
| 2004 | 0.87 [0.72, 1.07] | 0.82 [0.68, 1.01] | 0.82 [0.67, 1.02] | 0.85 [0.72, 1.01] | 0.81 [0.69, 0.95] | 0.78 [0.66, 0.93] |
| 2005 | 0.80 [0.66, 1.00] | 0.75 [0.61, 0.94] | 0.75 [0.61, 0.94] | 0.78 [0.66, 0.93] | 0.73 [0.62, 0.87] | 0.70 [0.59, 0.84] |
| 2006 | 0.79 [0.64, 0.99] | 0.73 [0.60, 0.91] | 0.74 [0.60, 0.92] | 0.83 [0.70, 0.98] | 0.77 [0.64, 0.91] | 0.74 [0.62, 0.89] |
| 2007 | 0.82 [0.66, 1.02] | 0.76 [0.61, 0.95] | 0.76 [0.61, 0.96] | 0.79 [0.66, 0.95] | 0.73 [0.61, 0.88] | 0.70 [0.58, 0.85] |
| 2008 | 0.87 [0.69, 1.11] | 0.79 [0.62, 1.01] | 0.78 [0.61, 1.01] | 0.80 [0.65, 0.98] | 0.73 [0.59, 0.89] | 0.69 [0.56, 0.85] |
| 2009 | 0.82 [0.57, 1.12] | 0.73 [0.51, 1.00] | 0.72 [0.50, 1.00] | 0.81 [0.61, 1.07] | 0.72 [0.55, 0.96] | 0.68 [0.51, 0.90] |

Model 1 unadjusted

Model 2-Adjusted for demographic variables

Model 3-further adjusted for body mass index, serum albumin concentration, estimated glomerular filtration rate at initiation of dialysis, and all comorbidities listed in Supplemental Table S3. Individual estimates of association for all covariates are shown in Table S5.



**Table S5: Estimated Associations Between Model Covariates and Study Outcomes\***

| Outcome                                 | Incident Hip Fracture | 30-Day Mortality after Hip Fracture |
|-----------------------------------------|-----------------------|-------------------------------------|
| Covariable                              | HR (95% CI)           | RR (95% CI)                         |
| Sex                                     |                       |                                     |
| Male                                    | 1.00                  | 1.00                                |
| Female                                  | 1.50 (1.45, 1.55)     | 0.78 (0.73, 0.84)                   |
| Age (per year)                          | 1.03 (1.03, 1.03)     | 1.03 (1.02, 1.04)                   |
| Race                                    |                       |                                     |
| White                                   | 1.00                  | 1.00                                |
| Black                                   | 0.51 (0.48, 0.53)     | 0.84 (0.76, 0.94)                   |
| Asian                                   | 0.70 (0.63, 0.78)     | 0.72 (0.55, 0.96)                   |
| Other                                   | 0.96 (0.85, 1.10)     | 0.86 (0.61, 1.22)                   |
| Ethnicity                               |                       |                                     |
| Non-Hispanic                            | 1.00                  | 1.00                                |
| Hispanic                                | 0.86 (0.81, 0.91)     | 0.77 (0.66, 0.89)                   |
| BMI                                     |                       |                                     |
| Underweight                             | 1.00                  | 1.00                                |
| Normal                                  | 0.88 (0.83, 0.93)     | 0.9 (0.8, 1.01)                     |
| Overweight                              | 0.72 (0.67, 0.76)     | 0.87 (0.77, 0.99)                   |
| Obese                                   | 0.55 (0.51, 0.59)     | 0.88 (0.76, 1.01)                   |
| Albumin (per 1 mg/dL)                   | 1.05 (1.01, 1.08)     | 0.95 (0.89, 1.01)                   |
| eGFR (per 1 mL/min/1.73m <sup>2</sup> ) | 1.00 (1.00, 1.00)     | 1.01 (1, 1.02)                      |
| Comorbidities                           |                       |                                     |
| Cerebrovascular bleed                   | 1.08 (0.96, 1.22)     | 1.28 (1.02, 1.60)                   |
| Cerebrovascular                         | 1.02 (0.98, 1.06)     | 0.99 (0.91, 1.07)                   |

|                                                     |                   |                    |
|-----------------------------------------------------|-------------------|--------------------|
| Gastrointestinal bleed                              | 1.03 (0.99, 1.07) | 1.04 (0.96, 1.12)  |
| HIV positive                                        | 1.47 (0.92, 2.33) | 1.52 (0.03, 68.15) |
| Hyponatremia                                        | 1.05 (1.00, 1.09) | 0.92 (0.84, 1.02)  |
| Peptic ulcer disease                                | 1.04 (0.97, 1.11) | 0.96 (0.84, 1.11)  |
| Acidosis                                            | 0.99 (0.95, 1.03) | 1.01 (0.93, 1.11)  |
| Atrial fibrillation                                 | 0.96 (0.93, 1.00) | 1.11 (1.03, 1.19)  |
| Alcohol abuse                                       | 1.15 (1.02, 1.30) | 0.97 (0.74, 1.27)  |
| Alkalosis                                           | 0.94 (0.82, 1.08) | 0.93 (0.68, 1.25)  |
| Myocardial infarction                               | 0.90 (0.86, 0.94) | 1.07 (0.98, 1.17)  |
| Arrhythmia (non atrial or ventricular fibrillation) | 0.98 (0.94, 1.02) | 1.00 (0.92, 1.08)  |
| Coronary artery bypass grafting                     | 1.00 (0.94, 1.06) | 0.88 (0.77, 1.00)  |
| Cancer                                              | 0.95 (0.91, 0.98) | 1.03 (0.95, 1.11)  |
| Dementia                                            | 0.98 (0.93, 1.03) | 0.98 (0.87, 1.10)  |
| Depression                                          | 1.08 (1.03, 1.13) | 0.99 (0.89, 1.09)  |
| Diabetes mellitus                                   | 1.18 (1.14, 1.22) | 1.03 (0.96, 1.11)  |
| Intravenous drug abuse                              | 1.00 (0.87, 1.16) | 1.09 (0.82, 1.46)  |
| Heart failure                                       | 1.01 (0.98, 1.05) | 1.16 (1.06, 1.26)  |
| Hypertension                                        | 1.63 (1.51, 1.76) | 0.88 (0.75, 1.03)  |
| Hypercalcemia                                       | 0.93 (0.83, 1.03) | 0.99 (0.77, 1.28)  |
| Hyperkalemia                                        | 0.99 (0.96, 1.03) | 1.00 (0.93, 1.08)  |
| Hypernatremia                                       | 1.01 (0.92, 1.11) | 0.91 (0.74, 1.13)  |
| Hyperparathyroidism                                 | 1.00 (0.92, 1.09) | 1.12 (0.93, 1.35)  |
| Hypocalcemia                                        | 1.00 (0.91, 1.09) | 1.07 (0.88, 1.30)  |
| Hypokalemia                                         | 1.05 (1.01, 1.10) | 0.97 (0.88, 1.06)  |
| Hypothyroidism                                      | 0.99 (0.96, 1.03) | 1.03 (0.95, 1.12)  |
| Implantable cardioverter defibrillator              | 1.01 (0.88, 1.16) | 1.11 (0.85, 1.43)  |
| Hyperlipidemia                                      | 1.02 (0.99, 1.06) | 0.95 (0.89, 1.02)  |
| Liver disease                                       | 1.00 (0.94, 1.06) | 1.06 (0.92, 1.21)  |
| Chronic lung disease                                | 1.03 (0.99, 1.06) | 1.13 (1.05, 1.21)  |
| Magnesium disorder                                  | 1.03 (0.93, 1.13) | 0.96 (0.77, 1.20)  |

|                                    |                   |                   |
|------------------------------------|-------------------|-------------------|
| Mixed acidosis                     | 0.92 (0.79, 1.06) | 0.78 (0.53, 1.15) |
| Obesity                            | 0.88 (0.82, 0.94) | 0.82 (0.68, 0.97) |
| Pacemaker                          | 0.93 (0.86, 1.01) | 1.10 (0.95, 1.28) |
| Paralysis                          | 0.97 (0.89, 1.05) | 0.94 (0.78, 1.13) |
| Percutaneous coronary intervention | 1.07 (0.99, 1.15) | 0.80 (0.68, 0.94) |
| Hypo/hyperphosphatemia             | 1.04 (0.95, 1.14) | 1.07 (0.88, 1.30) |
| Psychosis                          | 0.95 (0.88, 1.03) | 0.92 (0.78, 1.10) |
| Pulmonary hypertension             | 1.02 (0.97, 1.08) | 1.07 (0.96, 1.19) |
| Peripheral vascular disease        | 0.96 (0.93, 0.99) | 1.09 (1.02, 1.16) |
| Rheumatic disease                  | 1.09 (1.02, 1.15) | 0.99 (0.87, 1.14) |
| Ischemic stroke                    | 1.01 (0.96, 1.06) | 0.96 (0.87, 1.07) |
| Transient ischemic attack          | 1.03 (0.98, 1.09) | 1.12 (1.00, 1.25) |
| Tobacco abuse                      | 1.18 (1.10, 1.26) | 1.25 (1.10, 1.42) |
| Unstable angina                    | 0.97 (0.94, 1.01) | 1.04 (0.96, 1.13) |
| Valvular disease                   | 0.97 (0.94, 1.01) | 1.12 (1.04, 1.20) |
| Ventricular fibrillation           | 0.93 (0.87, 0.99) | 1.06 (0.93, 1.20) |

---

\* Note: All estimates from fully adjusted model using multiple imputation (estimates of exposure in previous table). These covariables were used for adjustment and served to maximize comparability of annual cohorts; these covariables were not evaluated for the purpose of inference or evidence generation and the estimated associations should not be directly interpreted.

**Figure S1: Flow Diagram of Cohort Derivation**

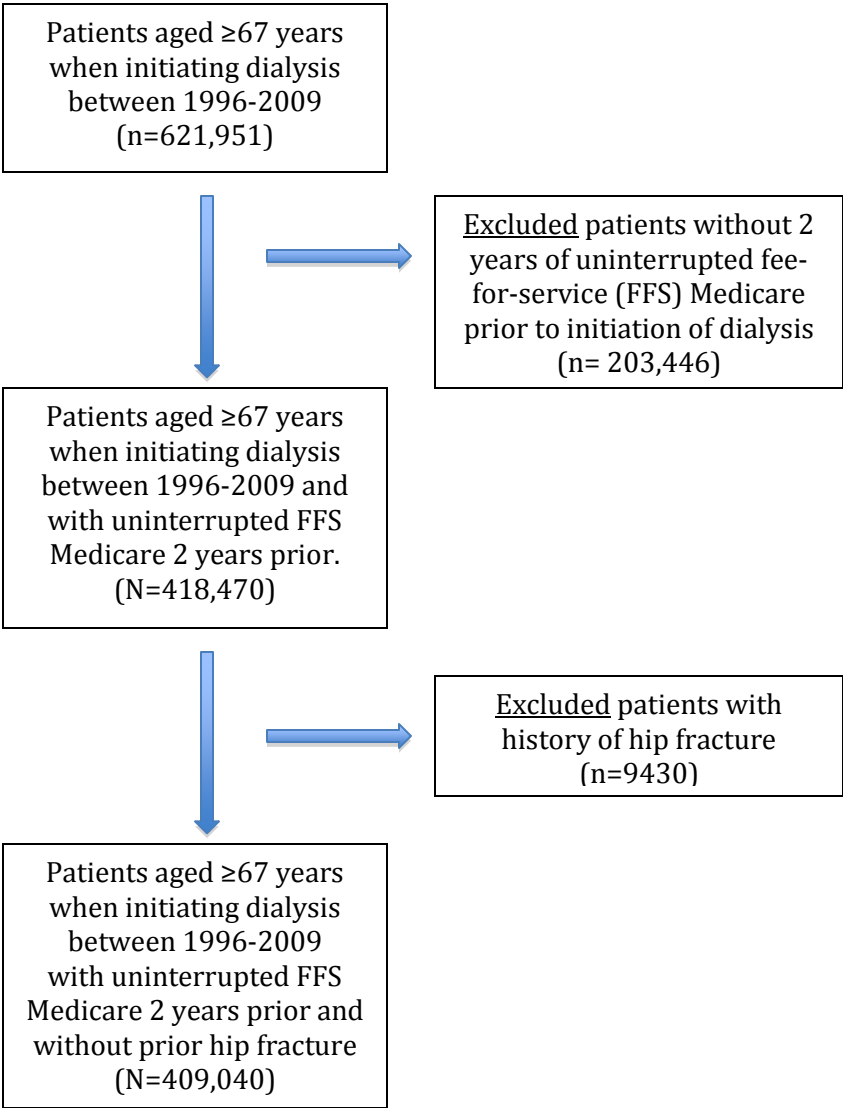

**Figure S2: Temporal Trends in the Causes of Death after Hip Fracture**

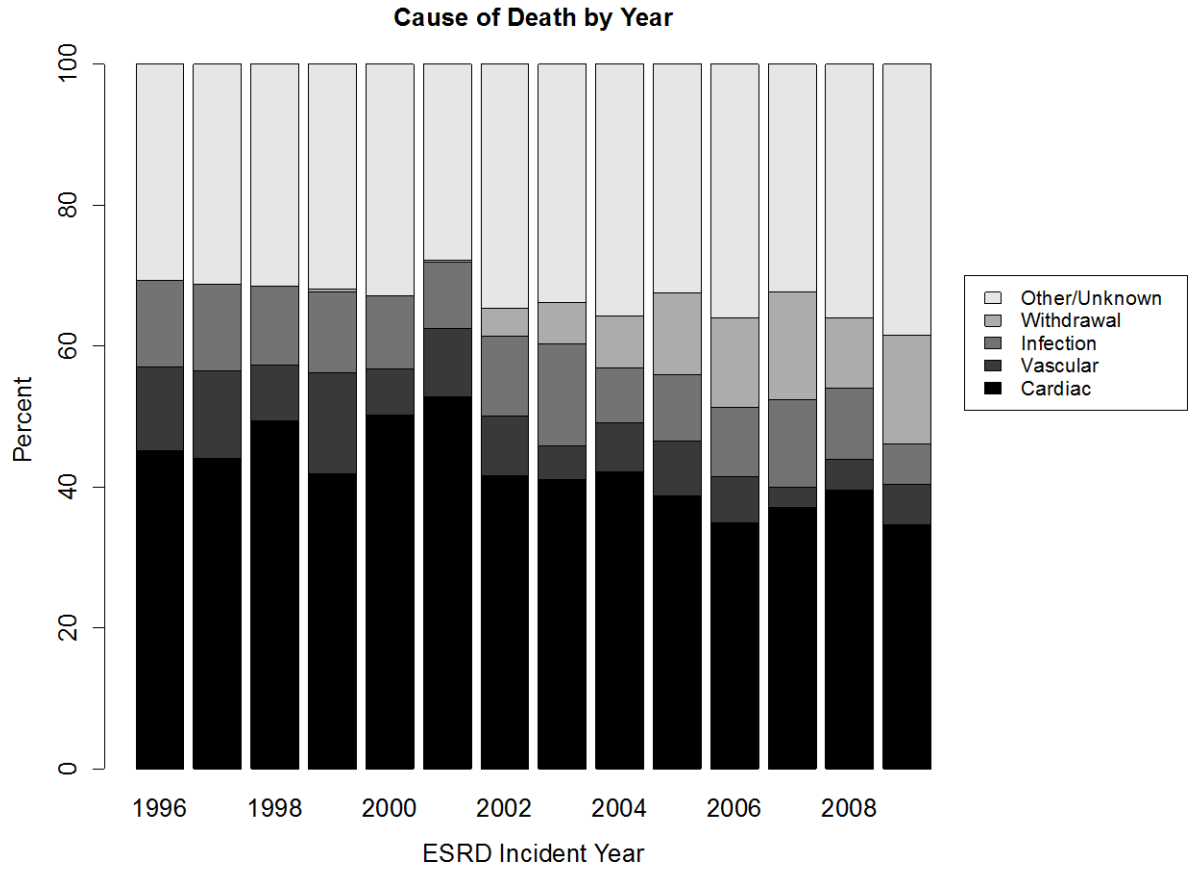

Supplement: NIHMS613550-supplement-Supplemental_data.pdf [file NIHMS613550-supplement-Supplemental_data.pdf]
